# Supplementary material for: Faith in Fat: A Multisite Examination of University Students’ Perceptions of Fat in the Diet
Source: Nutrients. 2020 Aug 24;12(9):2560. doi: 10.3390/nu12092560 (PMC7551440; doi:10.3390/nu12092560)
Supplement: Supplementary file 1 [file nutrients-12-02560-s001.pdf]

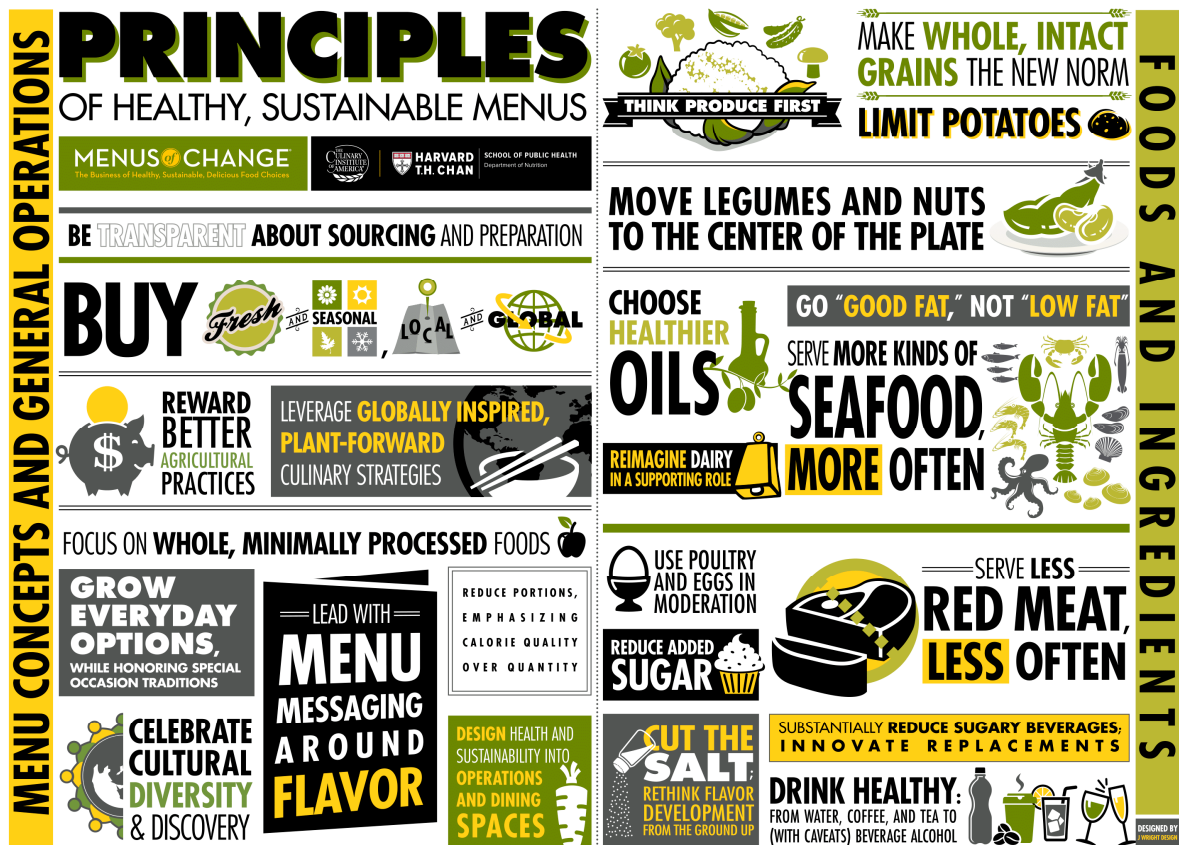

© 2019 The Culinary Institute of America and President and Fellows of Harvard College, as published in the Menus of Change® Annual Report. All rights reserved. See the full version of the principles at [www.menusofchange.org/principles-resources/moc-principles/](http://www.menusofchange.org/principles-resources/moc-principles/)

**Figure S1:** The Principles of Healthy, Sustainable Menus. Developed by the Culinary Institute of America and Harvard T. H. Chan School of Public Health as part of the Menus of Change Initiative, The Principles of Healthy, Sustainable Menus provide unique guidance for the foodservice industry, and bring together findings from nutritional and environmental science perspectives on optimal food choices, trends in consumer preferences, and impacts of projected demographic shifts. The principle “Go ‘Good Fat’, Not ‘Low Fat’” was the focus of this study examining college students’ perceptions of health among foods with no-fat relative to foods with different types of fats (unsaturated and saturated) and whether college students can accurately identify foods with healthy (unsaturated) versus unhealthy (saturated) dietary fats. Reproduced with permission from The Culinary Institute of America and President and Fellows of Harvard College.

**Table S1.** Characteristics of Schools Participating in the Faith in Fat Study

| <b>Characteristic</b>                         | <b>School A</b> | <b>School B</b> | <b>School C</b> | <b>School D</b> | <b>School E</b> | <b>School F</b> |
|-----------------------------------------------|-----------------|-----------------|-----------------|-----------------|-----------------|-----------------|
| <b>Undergraduate Population (n)</b>           | 31,577          | 1624            | 21,384          | 30,872          | 7,064           | 33,677          |
| <b>Female (%)</b>                             | 56.7            | 54.3            | 45.2            | 59.3            | 48.5            | 50.4            |
| <b>Race/Ethnicity(%)</b>                      |                 |                 |                 |                 |                 |                 |
| Asian                                         | 28.1            | 2.2             | 6.2             | 28.4            | 21.6            | 26.5            |
| Black                                         | 3.4             | 3.7             | 5.8             | 2.2             | 6.7             | 7.2             |
| Hispanic/Latino                               | 22.2            | 5.9             | 5.1             | 21.4            | 15.6            | 13.1            |
| White                                         | 26.7            | 80.4            | 69.2            | 25.1            | 35.6            | 38.8            |
| International                                 | 11.8            | 11.1            | 4.7             | 15.7            | 9.2             | 9.0             |
| Other <sup>1</sup>                            | 8.1             | 6.7             | 9.1             | 7.1             | 11.3            | 5.4             |
| <b>Public/Private</b>                         | Public          | Private         | Public          | Public          | Private         | Public          |
| <b>Population Density</b>                     | Urban           | Rural           | Urban           | Suburban        | Suburban        | Urban           |
| <b>Geographic Location (in United States)</b> | West            | Northeast       | Southeast       | West            | West            | Northeast       |

<sup>1</sup> Other includes Native Hawaiian or Other Pacific Islander, American Indian, Alaskan Native, or Unknown Ethnicity

**Table S2.** Frequency of Fat Option Choice by Sex in the Faith in Fat Study<sup>1</sup>

| Sample Size |     | Salad  |             |               | Main Entrée |             |               | Dessert |             |               |
|-------------|-----|--------|-------------|---------------|-------------|-------------|---------------|---------|-------------|---------------|
|             |     | No Fat | Healthy Fat | Unhealthy Fat | No Fat      | Healthy Fat | Unhealthy Fat | No Fat  | Healthy Fat | Unhealthy Fat |
| Male        | 278 | 74.5   | 23.4        | 2.2           | 71.9        | 20.9        | 7.2           | 62.6    | 32.0        | 5.4           |
| Female      | 254 | 79.5   | 19.3        | 1.2           | 78.0        | 16.9        | 5.1           | 74.4    | 23.2        | 2.4           |
| Not Listed  | 1   | 100    | 0.0         | 0.0           | 0.0         | 100         | 0.0           | 0.0     | 100         | 0.0           |

<sup>1</sup> Numbers reflect percent (%) within sex**Table S3.** Frequency of Fat Option Choice by School in the Faith in Fat Study<sup>1</sup>

| Sample Size |     | Salad  |             |               | Main Entrée |             |               | Dessert |             |               |
|-------------|-----|--------|-------------|---------------|-------------|-------------|---------------|---------|-------------|---------------|
|             |     | No Fat | Healthy Fat | Unhealthy Fat | No Fat      | Healthy Fat | Unhealthy Fat | No Fat  | Healthy Fat | Unhealthy Fat |
| School A    | 52  | 84.6   | 15.4        | 0.0           | 78.8        | 19.2        | 1.9           | 57.7    | 36.5        | 5.8           |
| School B    | 88  | 64.8   | 27.3        | 8.0           | 64.8        | 13.6        | 21.6          | 76.1    | 18.2        | 5.7           |
| School C    | 54  | 70.4   | 27.8        | 1.9           | 77.8        | 18.5        | 3.7           | 70.4    | 25.9        | 3.7           |
| School D    | 81  | 72.8   | 27.2        | 0.0           | 80.2        | 17.3        | 2.5           | 71.6    | 24.7        | 3.7           |
| School E    | 57  | 68.4   | 31.6        | 0.0           | 64.9        | 33.3        | 1.8           | 59.6    | 35.1        | 5.3           |
| School F    | 201 | 86.1   | 13.4        | 0.5           | 77.6        | 18.4        | 4.0           | 67.7    | 29.9        | 2.5           |

<sup>1</sup> Numbers reflect percent (%) within school**Table S4.** Frequency of Fat Option Choice by Year Classification in the Faith in Fat Study<sup>1</sup>

| Sample Size   |     | Salad  |             |               | Main Entrée |             |               | Dessert |             |               |
|---------------|-----|--------|-------------|---------------|-------------|-------------|---------------|---------|-------------|---------------|
|               |     | No Fat | Healthy Fat | Unhealthy Fat | No Fat      | Healthy Fat | Unhealthy Fat | No Fat  | Healthy Fat | Unhealthy Fat |
| First Year    | 229 | 78.6   | 19.7        | 1.7           | 74.7        | 20.1        | 5.2           | 67.2    | 29.3        | 3.5           |
| Second Year   | 132 | 86.4   | 12.9        | 0.8           | 74.2        | 17.4        | 8.3           | 70.5    | 26.5        | 3.0           |
| Third Year    | 75  | 70.7   | 26.7        | 2.7           | 82.7        | 13.3        | 4.0           | 70.7    | 22.7        | 6.7           |
| Fourth Year   | 53  | 67.9   | 30.2        | 1.9           | 69.8        | 17.0        | 13.2          | 67.9    | 26.4        | 5.7           |
| > Fourth Year | 23  | 65.2   | 30.4        | 4.3           | 73.9        | 26.1        | 0.0           | 52.2    | 47.8        | 0.0           |
| Not a Student | 21  | 57.1   | 42.9        | 0.0           | 61.9        | 38.1        | 0.0           | 71.4    | 23.8        | 4.8           |

<sup>1</sup> Numbers reflect percent (%) within year classification.
